# Supplementary material for: SIPGCN: A Novel Deep Learning Model for Predicting Self-Interacting Proteins from Sequence Information Using Graph Convolutional Networks
Source: MDPI journal article supplement (doi:10.3390/biomedicines10071543), 2022-06-29
Supplement: s1 [file s1]

**Table S1.** Accuracy results of different hyperparameters generated by grid search method.

| <b>learning rate\hidden<br/>neurons</b> | <b>16</b> | <b>32</b> | <b>64</b> | <b>128</b> | <b>256</b> | <b>512</b> | <b>1024</b> |
|-----------------------------------------|-----------|-----------|-----------|------------|------------|------------|-------------|
| 0.02                                    | 86.43%    | 88.13%    | 89.73%    | 91.23%     | 93.53%     | 90.75%     | 90.15%      |
| 0.04                                    | 87.09%    | 88.71%    | 90.18%    | 91.41%     | 93.95%     | 91.31%     | 90.79%      |
| 0.06                                    | 87.78%    | 89.28%    | 90.78%    | 91.78%     | 94.13%     | 91.78%     | 91.21%      |
| 0.08                                    | 88.49%    | 89.67%    | 90.84%    | 92.17%     | 94.30%     | 93.10%     | 91.80%      |
| 0.10                                    | 88.51%    | 89.92%    | 91.15%    | 92.38%     | 94.42%     | 93.07%     | 91.62%      |
| 0.12                                    | 88.13%    | 89.37%    | 91.07%    | 92.26%     | 94.28%     | 93.00%     | 91.29%      |
| 0.14                                    | 87.84%    | 89.22%    | 90.46%    | 91.90%     | 94.10%     | 92.86%     | 91.01%      |
| 0.16                                    | 87.46%    | 88.73%    | 90.21%    | 91.52%     | 93.77%     | 92.27%     | 90.64%      |
| 0.18                                    | 86.97%    | 88.14%    | 89.85%    | 91.08%     | 93.27%     | 91.49%     | 90.19%      |
